# Supplementary material
Source: PubMed Central journal article supplement (PMC3708444)
Supplement: NIHMS53845-supplement-01.pdf [file NIHMS53845-supplement-01.pdf]

## SUPPLEMENTARY ONLINE DATA

# Exo70, a subunit of the exocyst complex, interacts with SNEV<sup>hPrp19/hPso4</sup> and is involved in pre-mRNA splicing

Hanna DELLAGO<sup>\*1</sup>, Marlies LÖSCHER<sup>\*1</sup>, Paul AJUH<sup>†2</sup>, Ursula RYDER<sup>†</sup>, Christian KAISERMAYER<sup>\*</sup>, Regina GRILLARI-VOGLAUER<sup>\*</sup>, Klaus FORTSCHEGGER<sup>\*</sup>, Stefan GROSS<sup>\*</sup>, Anna GSTRANTHALER<sup>\*</sup>, Nicole BORTH<sup>\*</sup>, Frank EISENHABER<sup>‡§||</sup>, Angus I. LAMOND<sup>†3</sup> and Johannes GRILLARI<sup>\*3</sup>

<sup>\*</sup>Department of Biotechnology, University of Natural Resources and Life Sciences, Vienna, Austria, <sup>†</sup>Department of Gene Expression and Regulation, University of Dundee, Dundee, Scotland, U.K., <sup>‡</sup>Bioinformatics Institute (BI), Agency for Science, Technology and Research (A\*STAR), 30 Biopolis Street, Singapore 138671, <sup>§</sup>Department of Biological Sciences (DBS), National University of Singapore (NUS), 8 Medical Drive, Singapore 117597, and <sup>||</sup>School of Computer Engineering (SCE), Nanyang Technological University (NTU), 50 Nanyang Drive, Singapore 637553

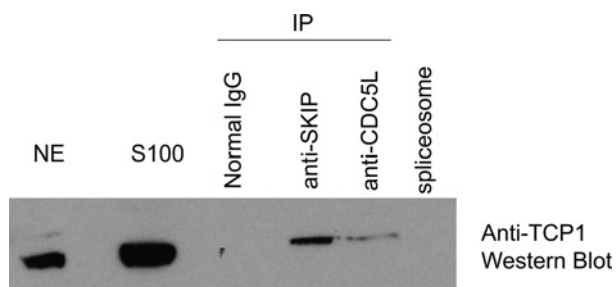

**Figure S1** TCP1 is co-precipitated with SKIP and Cdc5L, but not found in the spliceosome

Immunoprecipitation (IP) experiments were performed with HeLa nuclear extract using anti-SKIP or anti-Cdc5L antibodies bound to Protein A-agarose beads. Experimental details are as described in the Materials and methods section of the main text. The Western blot was probed with an anti-TCP1 antibody. NE, nuclear extract; S100, cytoplasmic extract.

**A** Different Sec6 (EXOC3) isoforms are co-precipitated from HeLa nuclear extracts with SKIP and are found in the spliceosome.

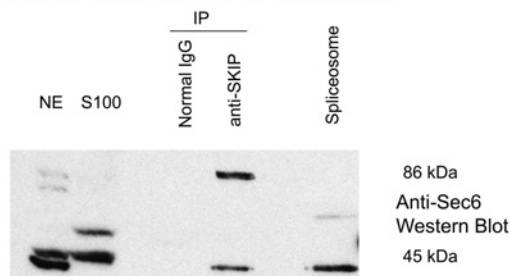

**B** Sec6 is co-precipitated from HeLa nuclear extract with SNEV<sup>hPrp19/hPso4</sup> and Blom7.

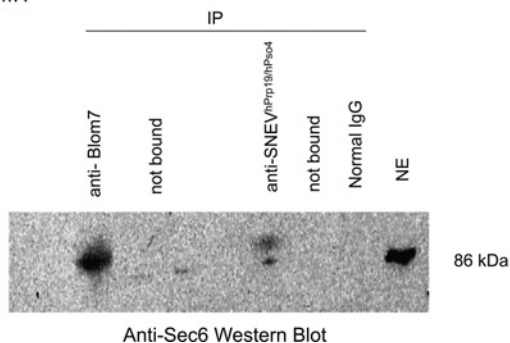

**Figure S2** Sec6 (EXOC3) is co-precipitated with splicing factors SKIP, SNEV<sup>hPrp19/hPso4</sup> and Blom7

<sup>1</sup> These authors contributed equally to this work.

<sup>2</sup> Present address: Dundee Cell Products Limited, Dundee University Incubator, Dundee, Scotland, U.K.

<sup>3</sup> To whom correspondence should be addressed (email johannes.grillari@boku.ac.at).

Sequence data have been termed Exo 70\_5 and Exo70\_6 and submitted to the DDBJ, EMBL, GenBank<sup>®</sup> and GSDB databases under accession numbers FJ457119 and FJ457120.

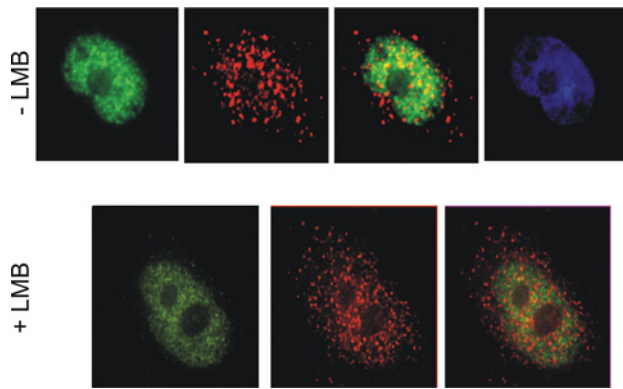

**Figure S3 Sec6 (EXOC3) co-localizes with SNEV<sup>hPrp19/hPso4</sup> in the nucleus upon LMB treatment**

LMB treatment and immunofluorescence staining were carried out as described in the Materials and methods section of the main paper.

---

Received 28 January 2011/31 May 2011; accepted 3 June 2011  
Published as BJ Immediate Publication 3 June 2011, doi:10.1042/BJ20110183
